# Supplementary material for: The Stickland Reaction Precursor trans-4-Hydroxy-l-Proline Differentially Impacts the Metabolism of Clostridioides difficile and Commensal Clostridia
Source: PubMed Central journal article supplement (PMC9044972; doi:10.1128/msphere.00926-21), 2022-03-30

**A****Alpha Diversity - Family Only**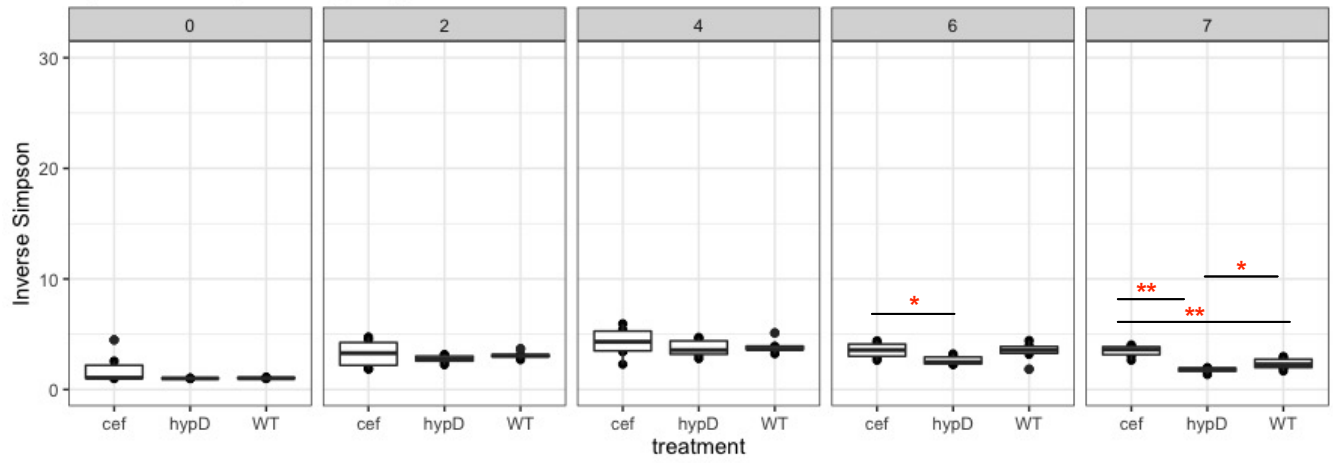**B****NMDS - All**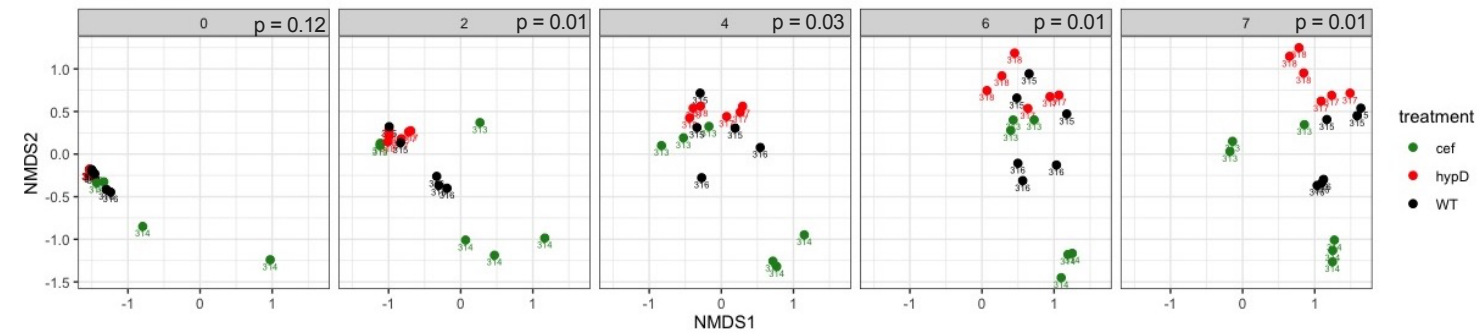**C****NMDS - Infected**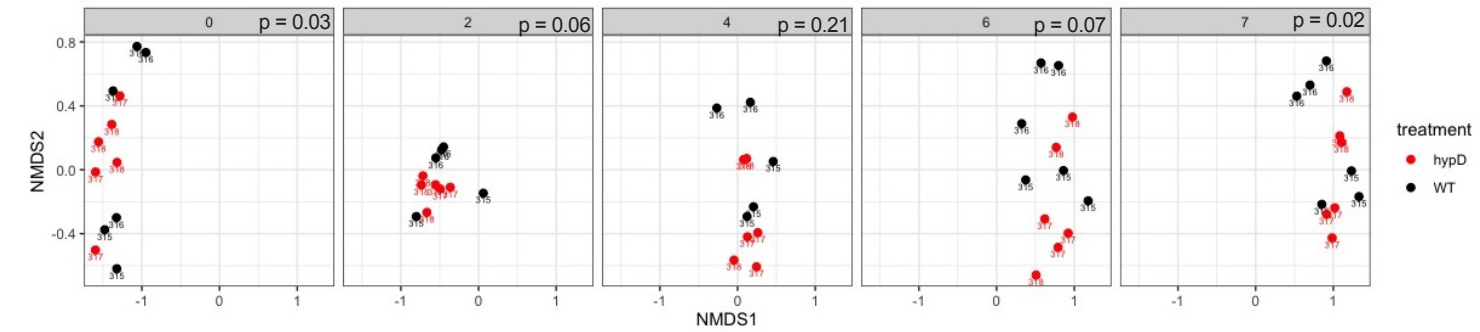

Supplement: msphere.00926-21-sf002.pdf [file msphere.00926-21-sf002.pdf]
