# Supplementary material for: The Stickland Reaction Precursor trans-4-Hydroxy-l-Proline Differentially Impacts the Metabolism of Clostridioides difficile and Commensal Clostridia
Source: PubMed Central journal article supplement (PMC9044972; doi:10.1128/msphere.00926-21), 2022-03-30
Supplement: msphere.00926-21-sf004.pdf [file msphere.00926-21-sf004.pdf]

A

*C. hiranonis*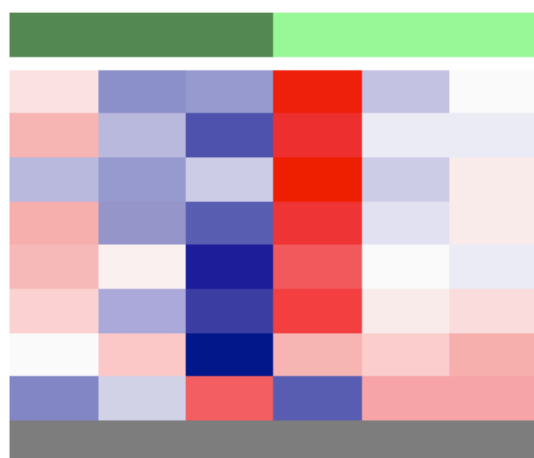

*baiB* (KGNDJEFE 00401)  
*baiCD* (KGNDJEFE 00402)  
*baiE* (KGNDJEFE 00403)  
*baiA2* (KGNDJEFE 00404)  
*baiF* (KGNDJEFE 00405)  
*baiG* (KGNDJEFE 00406)  
*baiH* (KGNDJEFE 00407)  
*baiI* (KGNDJEFE 00408)  
*baiA1*

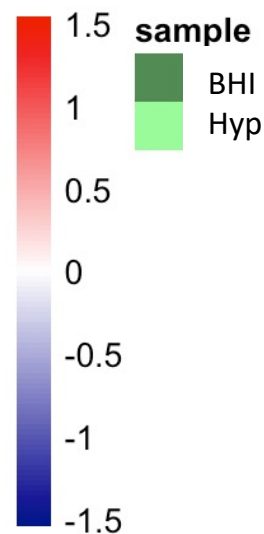

B

*C. hylemonae*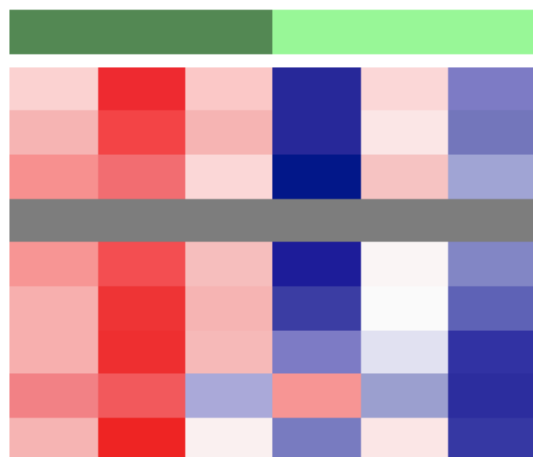

*baiB* (LAJLEIBI 01436)  
*baiCD* (LAJLEIBI 01437)  
*baiE* (LAJLEIBI 01438)  
*baiA2*  
*baiF* (LAJLEIBI 01439)  
*baiG* (LAJLEIBI 01440)  
*baiH* (LAJLEIBI 01441)  
*baiI* (LAJLEIBI 01442)  
*baiA1* (LAJLEIBI 01707)

C

*C. scindens*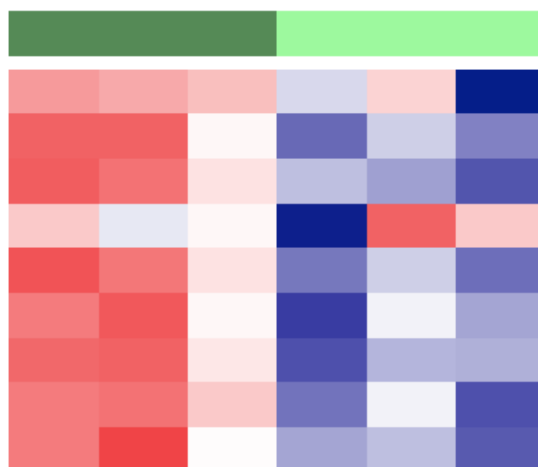

*baiB* (HDCHBGLK RS07215)  
*baiCD* (HDCHBGLK RS07220)  
*baiE* (HDCHBGLK RS07225)  
*baiA2* (HDCHBGLK RS12450)  
*baiF* (HDCHBGLK RS07235)  
*baiG* (HDCHBGLK RS07240)  
*baiH* (HDCHBGLK RS07245)  
*baiI* (HDCHBGLK RS07250)  
*baiA1* (HDCHBGLK RS16775)
